# Supplementary material for: Finding multiple reaction pathways via global optimization of action
Source: PubMed Central journal article supplement (PMC5458546; doi:10.1038/ncomms15443), 2017-05-26
Supplement: ncomms15443-s1.pdf [file ncomms15443-s1.pdf]

**Supplementary Table 1. Parameters for Action-CSA calculations**

| <b>INDEX</b> | <b>DESCRIPTION OF PARAMETER</b>                       |
|--------------|-------------------------------------------------------|
| <b>1</b>     | Total transition time                                 |
| <b>2</b>     | Number of pathway steps                               |
| <b>3</b>     | Number of pathways retained in bank at each iteration |
| <b>4</b>     | Number of crossover and mutation operations           |
| <b>5</b>     | Temperature                                           |
| <b>6</b>     | Friction coefficient                                  |
| <b>7</b>     | Weight of total energy conservation term              |
| <b>8</b>     | Annealing schedule of pathway separation distance     |
| <b>9</b>     | Solvation model                                       |
| <b>10</b>    | Protein force field                                   |

Supplementary Table 2. List of 14 unique pathway types and 44 non-redundant pathways for conformational change of hexane from g-g-g- to g+g+g+

| Unique path type | Non-redundant path                                  |
|------------------|-----------------------------------------------------|
| C+C+             | g-g-g- → tg-g- → tg-t → ttt → tg+t → tg+g+ → g+g+g+ |
|                  | g-g-g- → g-g-t → tg-t → ttt → tg+t → g+g+t → g+g+g+ |
| C+C-             | g-g-g- → g-g-t → tg-t → ttt → tg+t → tg+g+ → g+g+g+ |
|                  | g-g-g- → tg-g- → tg-t → ttt → tg+t → g+g+t → g+g+g+ |
| T+C+             | g-g-g- → tg-g- → tg-t → ttt → ttg+ → tg+g+ → g+g+g+ |
|                  | g-g-g- → g-g-t → tg-t → ttt → g+tt → g+g+t → g+g+g+ |
|                  | g-g-g- → g-g-t → g-tt → ttt → tg+t → g+g+t → g+g+g+ |
|                  | g-g-g- → tg-g- → ttg- → ttt → tg+t → tg+g+ → g+g+g+ |
| T+C-             | g-g-g- → g-g-t → tg-t → ttt → ttg+ → tg+g+ → g+g+g+ |
|                  | g-g-g- → tg-g- → tg-t → ttt → g+tt → g+g+t → g+g+g+ |
|                  | g-g-g- → g-g-t → g-tt → ttt → tg+t → tg+g+ → g+g+g+ |
|                  | g-g-g- → tg-g- → ttg- → ttt → tg+t → g+g+t → g+g+g+ |
| C+M+             | g-g-g- → tg-g- → tg-t → ttt → ttg+ → g+tg+ → g+g+g+ |
|                  | g-g-g- → g-g-t → tg-t → ttt → g+tt → g+tg+ → g+g+g+ |
|                  | g-g-g- → g-tg- → ttg- → ttt → tg+t → g+g+t → g+g+g+ |
|                  | g-g-g- → g-tg- → g-tt → ttt → tg+t → tg+g+ → g+g+g+ |
| C+M-             | g-g-g- → g-g-t → tg-t → ttt → ttg+ → g+tg+ → g+g+g+ |
|                  | g-g-g- → tg-g- → tg-t → ttt → g+tt → g+tg+ → g+g+g+ |
|                  | g-g-g- → g-tg- → g-tt → ttt → tg+t → g+g+t → g+g+g+ |
|                  | g-g-g- → g-tg- → ttg- → ttt → tg+t → tg+g+ → g+g+g+ |
| T+T+             | g-g-g- → tg-g- → ttg- → ttt → ttg+ → tg+g+ → g+g+g+ |
|                  | g-g-g- → g-g-t → g-tt → ttt → g+tt → g+g+t → g+g+g+ |
| T+T-             | g-g-g- → tg-g- → ttg- → ttt → g+tt → g+g+t → g+g+g+ |
|                  | g-g-g- → g-g-t → g-tt → ttt → ttg+ → tg+g+ → g+g+g+ |
| T+M+             | g-g-g- → g-g-t → g-tt → ttt → g+tt → g+tg+ → g+g+g+ |
|                  | g-g-g- → tg-g- → ttg- → ttt → ttg+ → g+tg+ → g+g+g+ |
|                  | g-g-g- → g-tg- → g-tt → ttt → g+tt → g+g+t → g+g+g+ |
|                  | g-g-g- → g-tg- → ttg- → ttt → ttg+ → tg+g+ → g+g+g+ |
| T+M-             | g-g-g- → g-g-t → g-tt → ttt → ttg+ → g+tg+ → g+g+g+ |
|                  | g-g-g- → tg-g- → ttg- → ttt → g+tt → g+tg+ → g+g+g+ |
|                  | g-g-g- → g-tg- → g-tt → ttt → ttg+ → tg+g+ → g+g+g+ |
|                  | g-g-g- → g-tg- → ttg- → ttt → g+tt → g+g+t → g+g+g+ |
| M+M-             | g-g-g- → g-tg- → g-tt → ttt → ttg+ → g+tg+ → g+g+g+ |
|                  | g-g-g- → g-tg- → ttg- → ttt → g+tt → g+tg+ → g+g+g+ |
|                  | g-g-g- → g-tg- → g-tt → ttt → g+tt → g+g+t → g+g+g+ |
|                  | g-g-g- → g-tg- → ttg- → ttt → ttg+ → g+tg+ → g+g+g+ |

|              |                                                                                                                     |
|--------------|---------------------------------------------------------------------------------------------------------------------|
| <b>T+XT-</b> | $g-g-g- \rightarrow g-g-t \rightarrow g-tt \rightarrow g-tg+ \rightarrow ttg+ \rightarrow tg+g+ \rightarrow g+g+g+$ |
|              | $g-g-g- \rightarrow tg-g- \rightarrow ttg- \rightarrow g+tg- \rightarrow g+tt \rightarrow g+g+t \rightarrow g+g+g+$ |
| <b>TXM</b>   | $g-g-g- \rightarrow g-tg- \rightarrow g-tt \rightarrow g-tg+ \rightarrow ttg+ \rightarrow tg+g+ \rightarrow g+g+g+$ |
|              | $g-g-g- \rightarrow tg-g- \rightarrow ttg- \rightarrow g+tg- \rightarrow g+tt \rightarrow g+tg+ \rightarrow g+g+g+$ |
|              | $g-g-g- \rightarrow g-g-t \rightarrow g-tt \rightarrow g-tg+ \rightarrow ttg+ \rightarrow g+tg+ \rightarrow g+g+g+$ |
|              | $g-g-g- \rightarrow g-tg- \rightarrow ttg- \rightarrow g+tg- \rightarrow g+tt \rightarrow g+g+t \rightarrow g+g+g+$ |
| <b>M+XM-</b> | $g-g-g- \rightarrow g-tg- \rightarrow g-tt \rightarrow g-tg+ \rightarrow ttg+ \rightarrow g+tg+ \rightarrow g+g+g+$ |
|              | $g-g-g- \rightarrow g-tg- \rightarrow ttg- \rightarrow g+tg- \rightarrow g+tt \rightarrow g+tg+ \rightarrow g+g+g+$ |

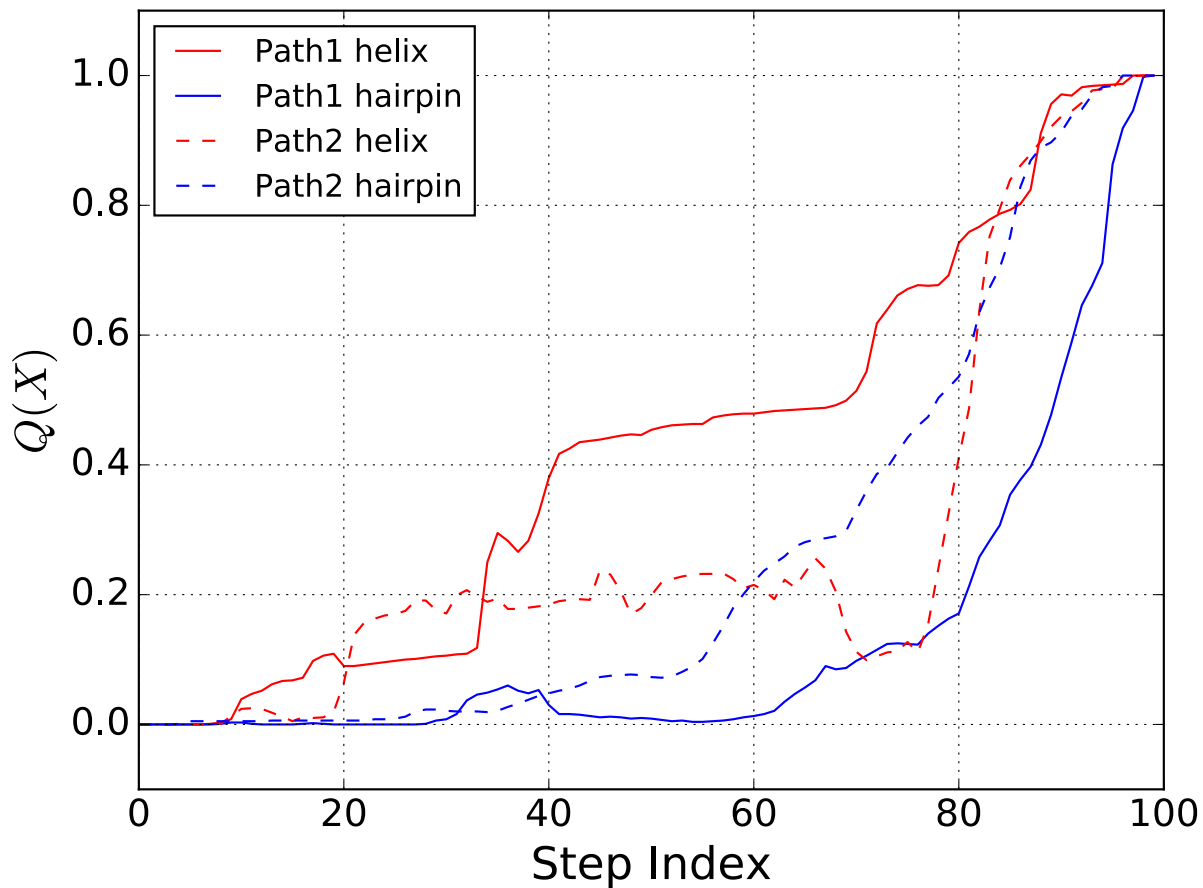

**Supplementary Figure 1. A comparison of native contact fractions  $Q(x)$  of the helix and hairpin regions of FSD-1 along the lowest OM action pathways.** Red and blue lines represent the helix and the hairpin regions of FSD-1. Solid and dashed lines represent the lowest and second lowest OM action pathways.
